# Supplementary material for: By land or by sea: a modified C-start motor pattern drives the terrestrial tail-flip
Source: Oxford University Press journal article supplement (doi:10.1242/jeb.128744), 2016-01-01
Supplement: jeb128744supp.pdf [file jeb128744supp.pdf]

## SUPPLEMENTARY MATERIAL

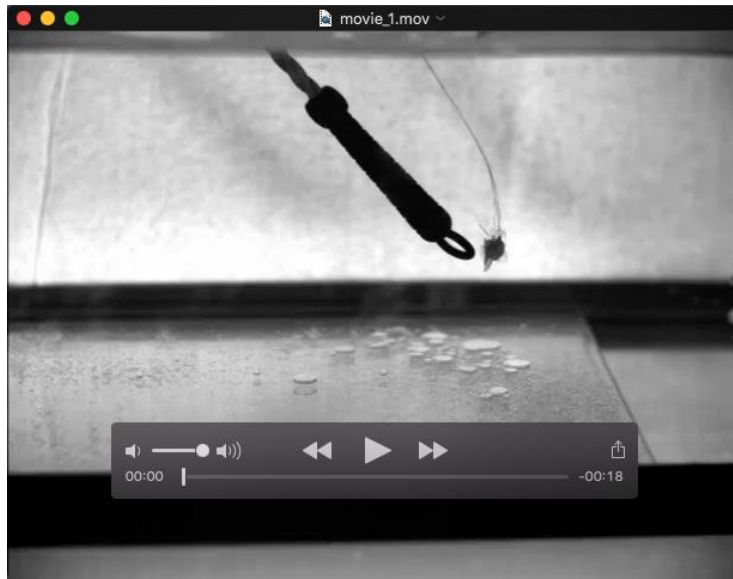

**Movie 1.** Aquatic escape response. The end of a dip net was used as a stimulus to elicit a fast-start escape response. Filmed at 500 frames per second.

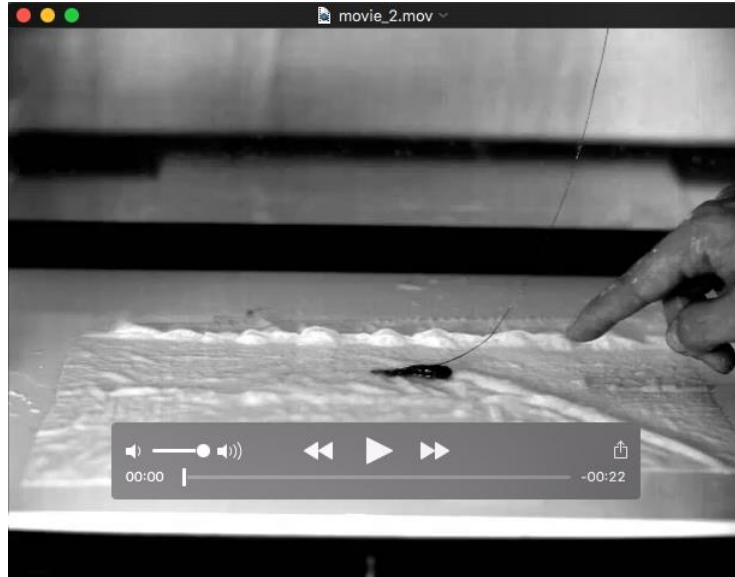

**Movie 2.** Terrestrial escape response. The end of a dip net or a finger was used as a stimulus to elicit a terrestrial tail-flip (no statistical differences were found in the latent response of using either stimulus; Student's t-test:  $P > 0.05$ ). Filmed at 500 frames per second.
